# Supplementary material for: Structural phase transition and dielectric responses in two novel cyano-bridged coordination polymers synthesized by sealing the incomplete cyano-bridged cage
Source: Royal Society of Chemistry journal article supplement (doi:10.1039/d3qi01151h), 2023-01-01
Supplement: d3qi01151h1.pdf [file d3qi01151h1.pdf]

## Electronic Supplementary Information

### Structural phase transition and dielectric response in two novel cyano-bridged coordination polymers synthesized by sealing the incomplete cyano-bridged cage

Zhuoer Cai,<sup>‡a</sup> Xiu-Ni Hua,<sup>‡\*b</sup> Yinan Zhang,<sup>a</sup> Jian Chen,<sup>a</sup> Kai Sun,<sup>c</sup> Zining Wang,<sup>a</sup> Xianmin Liu,<sup>a</sup> Xinyi Zhang,<sup>a</sup> Shiyue Xiao<sup>a</sup> and Baiwang Sun<sup>a</sup>

---

<sup>a</sup> School of Chemistry and Chemical Engineering, Southeast University, Nanjing 211189, P. R. China.

<sup>b</sup> School of Environmental Science, Nanjing Xiaozhuang University, Nanjing 211171, P. R. China. E-mail address: [huaxiuni@njxzc.edu.cn](mailto:huaxiuni@njxzc.edu.cn)

<sup>c</sup> Jiangsu Key Laboratory for Biomass-based Energy and Enzyme Technology, School of Chemistry and Chemical Engineering, Huaiyin Normal University, Huaian 223300, China °

## Contents:

### Calculations of Molecular structure

#### SEM Measurement

**Fig. S1** PXRD patterns of **3** at room temperature and a simulated PXRD patterns (a). at room temperature. A comparison of PXRD patterns for **3** and **4** at room temperature (b).

**Fig. S2** Infrared spectrum of **3** and **4** at room temperature.

**Fig. S3** TG result of **3** (a) and **4** (b).

**Fig. S4** Temperature dependence of the dielectric constant of **3** and **4** with different frequencies.

**Fig. S5** Molecular Electrostatic potential surfaces of *N,N,N',N'*-tetramethylethylenediamine.

**Fig. S6** Lowest Unoccupied Molecular Orbital of *N,N,N',N'*-tetramethylethylenediamine.

**Fig. S7** Highest Occupied Molecular Orbital of *N,N,N',N'*-tetramethylethylenediamine.

**Fig. S8** 3D  $d_{\text{norm}}$  Hirshfeld surface and 2D fingerprint plots of **1** at 150 K.

**Fig. S9** 3D  $d_{\text{norm}}$  Hirshfeld surface and 2D fingerprint plots of **2** at 150 K.

**Fig. S10** 3D  $d_{\text{norm}}$  Hirshfeld surface and 2D fingerprint plots of **2** at 323 K.

**Fig. S11** 3D  $d_{\text{norm}}$  Hirshfeld surface and 2D fingerprint plots of **3** at 100 K.

**Fig. S12** 3D  $d_{\text{norm}}$  Hirshfeld surface and 2D fingerprint plots of **3** at 323 K.

**Fig. S13** SEM image of smooth area of **1** at room temperature.

**Fig. S14** SEM image of coarse area of **1** at room temperature.

**Fig. S15** SEM image of smooth area of **2** at room temperature.

**Fig. S16** SEM image of coarse area of **2** at room temperature.

**Fig. S17** SEM image of smooth area of **3** at room temperature.

**Fig. S18** SEM image of coarse area of **3** at room temperature.

**Fig. S19** SEM image of smooth area of **4** at room temperature.

**Fig. S20** SEM image of coarse area of **1** at room temperature.

**Tab. S1** Crystal structure of **1**, **2**, **3** at different temperature.

**Tab. S2** Selected atomic coordinates and  $U_{\text{eq}}$  [ $\text{\AA}^2$ ] for **1** at 150 K.

**Tab. S3** Selected atomic coordinates and  $U_{\text{eq}}$  [ $\text{\AA}^2$ ] for **2** at 150 K.

**Tab. S4** Selected atomic coordinates and  $U_{\text{eq}}$  [ $\text{\AA}^2$ ] for **2** at 323 K.

**Tab. S5** Selected atomic coordinates and  $U_{\text{eq}}$  [ $\text{\AA}^2$ ] for **3** at 323 K.

**Tab. S6** Selected atomic coordinates and  $U_{\text{eq}}$  [ $\text{\AA}^2$ ] for **3** at 100 K.

**Tab. S7** The Values of the  $T_c$ ,  $\Delta\varepsilon'$  and  $\varepsilon'$  (1 MHz) for selected cyano-bridged coordination polymers.

#### References

## Calculations of Molecular structure

Molecular electrostatic potential surfaces are important space function in quantum chemistry. It can be used to explain and predict electrostatic interactions between molecules, electrostatic potential charge fitting for molecular simulation, nucleophilic and electrophilic reaction sites. Molecular electrostatic potential surfaces and molecular frontier orbital energy of *N,N,N',N'*-tetramethylethylenediamine were calculated by Gaussian 16 package with DFT/B3LYP and 6-311<sup>++</sup>g (d,p) basis sets after optimization (Fig. S5, Fig. S6 and Fig. S7). The molecular electrostatic potential surfaces were drawn on the electron density isosurface of 0.004 Bohr  $\text{\AA}^{-3}$ . The maximum and minimum value of electrostatic potential are 0.27 and 0.35 eV. The electrostatic potential involved in the analyses was evaluated by Multiwfn and VMD based on the highly effective algorithm.<sup>1,2</sup> The spatial configuration of organic guest cation of calculation result is consistent with it in single crystal structure.

The Hirshfeld Surface was analyzed and produced on the basis of its single crystal data using CrystalExplorer v17.0 software (Fig. S8, Fig. S9, Fig. S10, Fig. S11 and Fig. S12,). Pairs of  $d_i$  and  $d_e$  values were used to depict the 2D fingerprint plots.<sup>3</sup> It can be seen from Fig. S9 and Fig. S10, at 323 K, organic cation became server disorder over two sites. The interactions between molecules also changed, especially H $\cdots$ O interactions. For **2**, H $\cdots$ O interactions comprise 3.7 % of all interactions at 150 K, while H $\cdots$ O interactions comprise only 0.3 % of all interactions at 323 K. We surmise that the disorder movement of organic cations caused displacement of cyano-group skeleton and water molecules, inducing larger voids in the framework and less binding on water molecules. Thus, **1** and **2** are not stable enough and started to dehydration and form **3** and **4**.

## SEM Measurement

SEM measurement was carried on a Navo nano SEM450. To enhance the electrical conductivity of the sample, platinum is sprayed on the surface of the sample. To fully reveal the morphology of the crystal, both smooth and rough areas of the crystal surface were photographed. It is obvious that there are more cracks on the surface of **3** and **4** than **1** and **2**, which were probably caused by the escape of water molecules. Water molecules in the center of the crystal were steamed out and cause a damage to the peripheral morphology of the crystal.

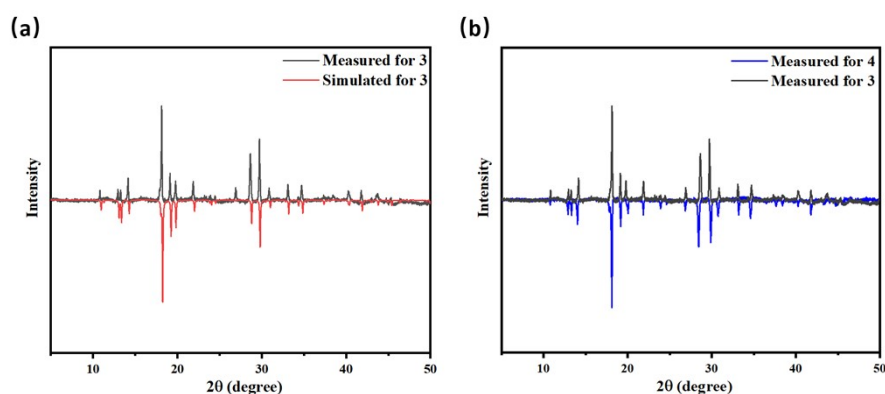

**Fig. S1** PXRD patterns of **3** at room temperature and a simulated PXRD patterns (a). at room temperature. A comparison of PXRD patterns for **3** and **4** at room temperature (b).

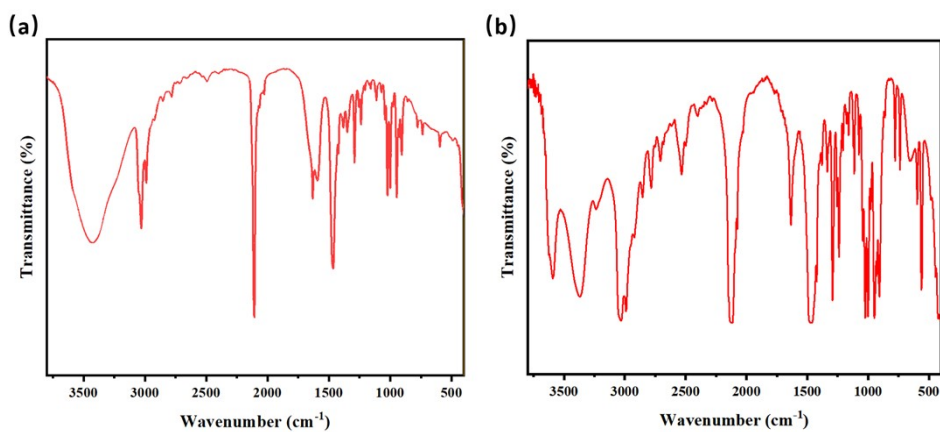

**Fig. S2** Infrared spectrum of **3** and **4** at room temperature.

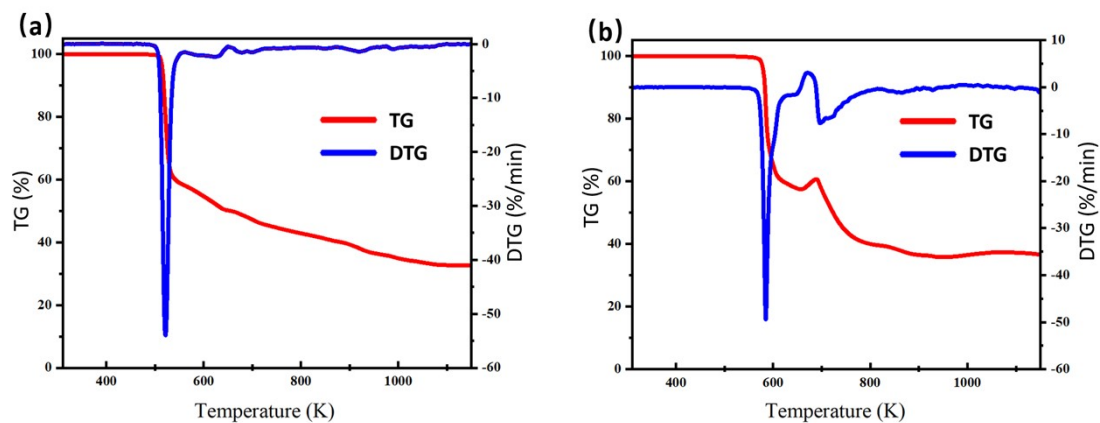

**Fig. S3** TG result of **3** (a) and **4** (b).

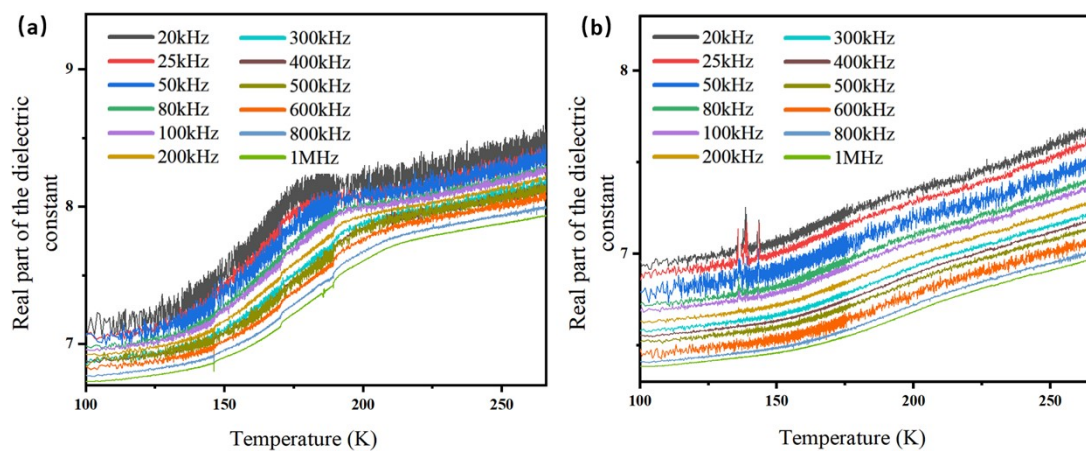

**Fig. S4** Temperature dependence of the dielectric constant of **3** (a) and **4** (b) with different frequencies.

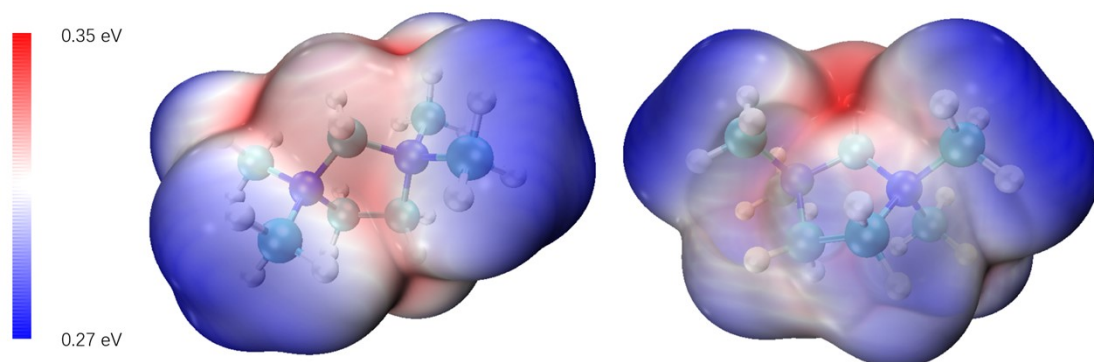

**Fig. S5** Molecular Electrostatic potential surfaces of *N,N,N',N'*-tetramethylethylenediamine.

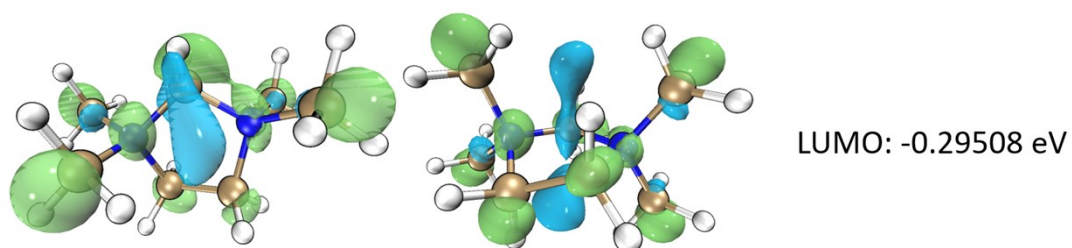

**Fig. S6** Lowest Unoccupied Molecular Orbital of *N,N,N',N'*-tetramethylethylenediamine.

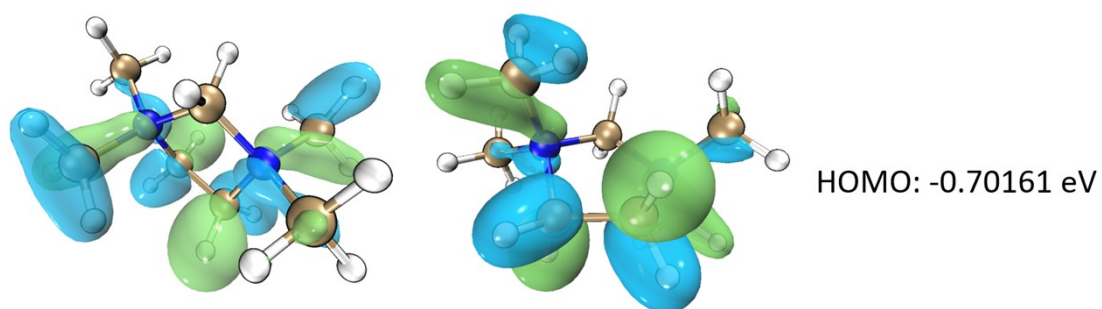

**Fig. S7** Highest Occupied Molecular Orbital of *N,N,N',N'*-tetramethylethylenediamine.

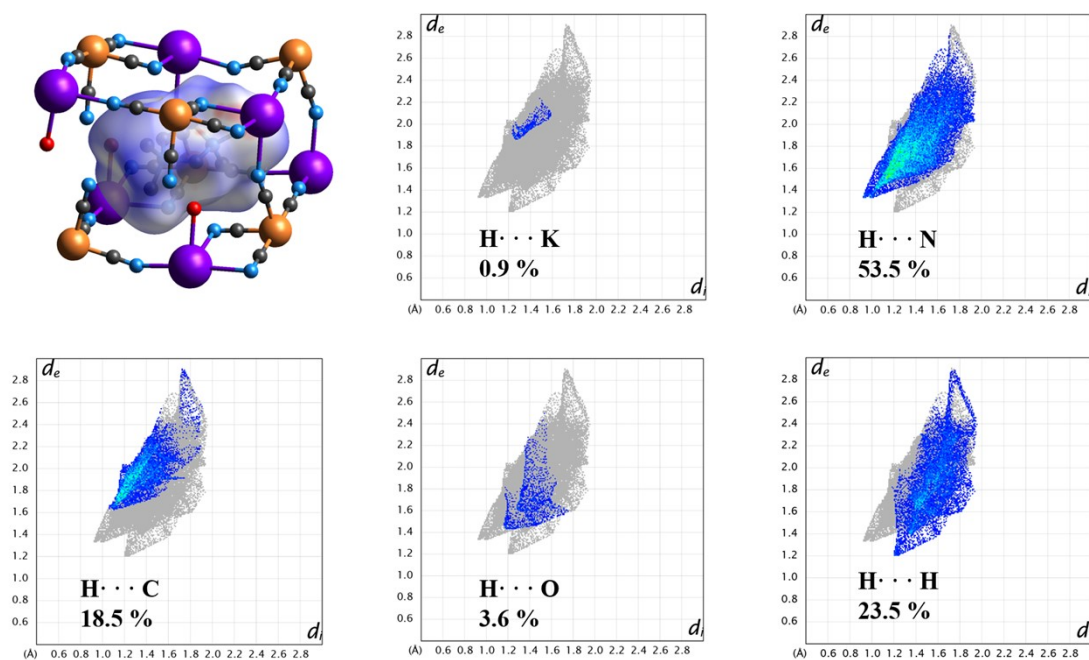

**Fig. S8** 3D  $d_{\text{norm}}$  Hirshfeld surface and 2D fingerprint plots of **1** at 150 K; the full fingerprint appears beneath each decomposed plot as a grey shadow.

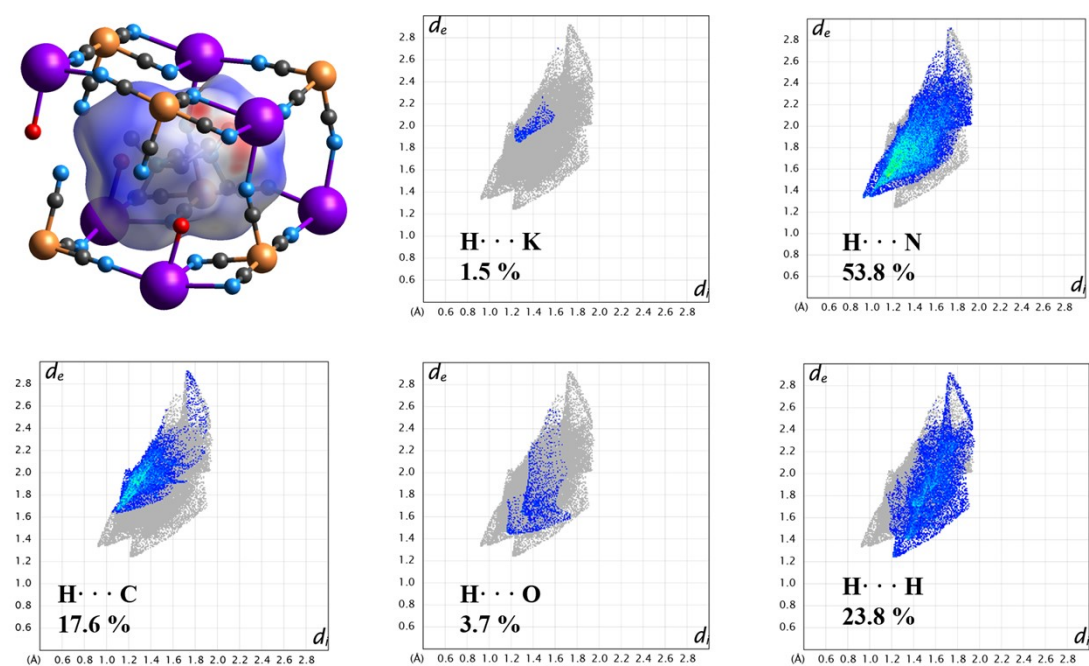

**Fig. S9** 3D  $d_{\text{norm}}$  Hirshfeld surface and 2D fingerprint plots of **2** at 150 K; the full fingerprint appears beneath each decomposed plot as a grey shadow.

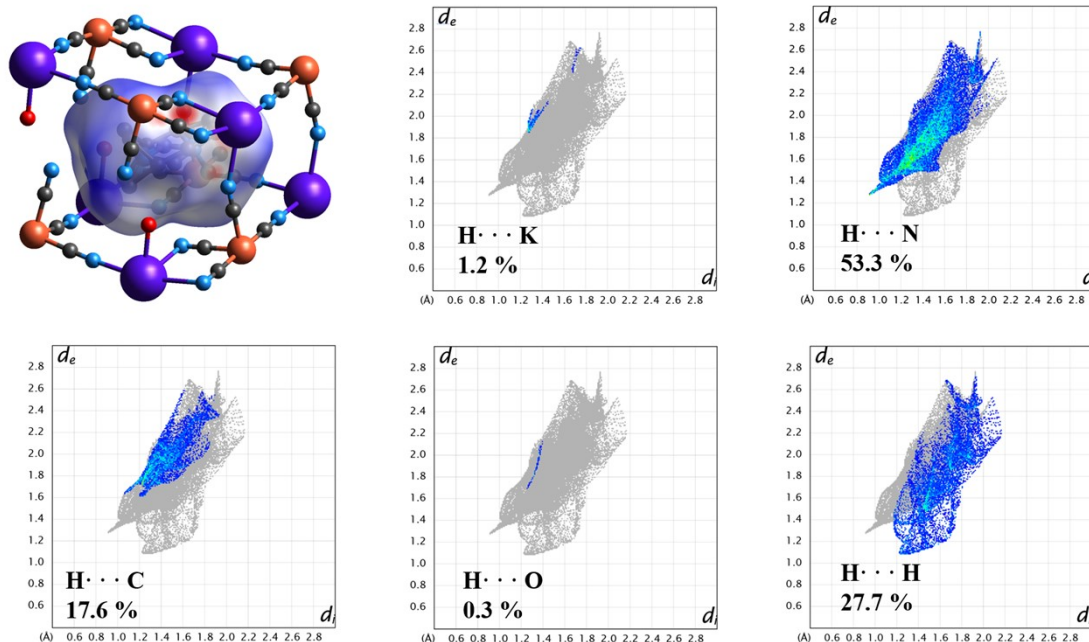

**Fig. S10** 3D  $d_{\text{norm}}$  Hirshfeld surface and 2D fingerprint plots of **2** at 323 K; the full fingerprint appears beneath each decomposed plot as a grey shadow.

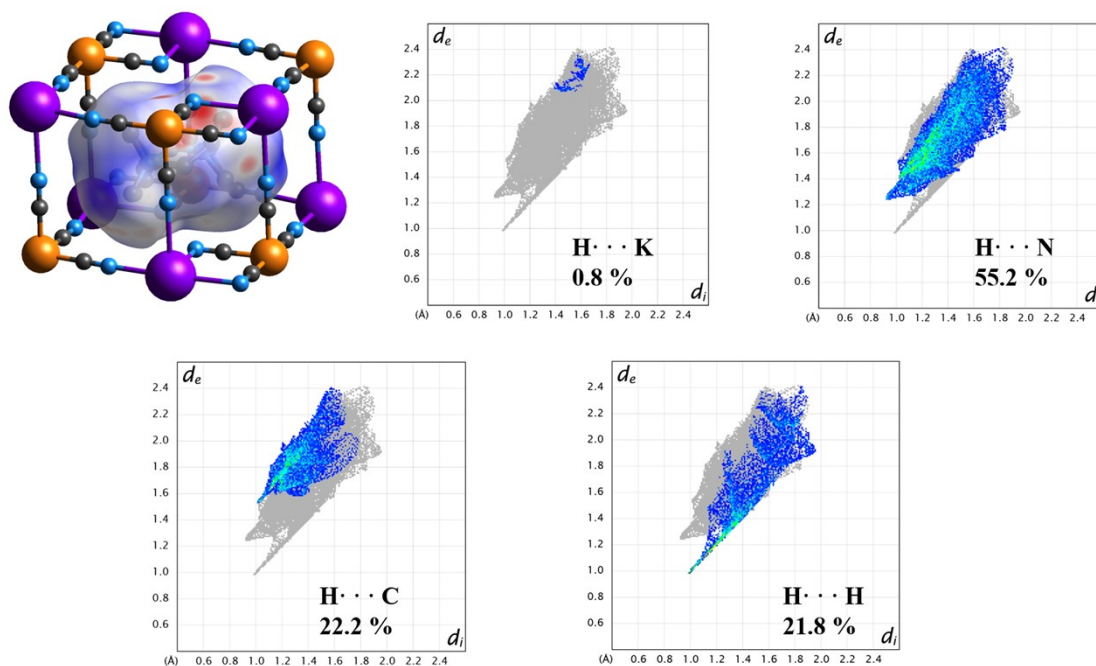

**Fig. S11** 3D  $d_{\text{norm}}$  Hirshfeld surface and 2D fingerprint plots of **3** at 100 K; the full fingerprint appears beneath each decomposed plot as a grey shadow.

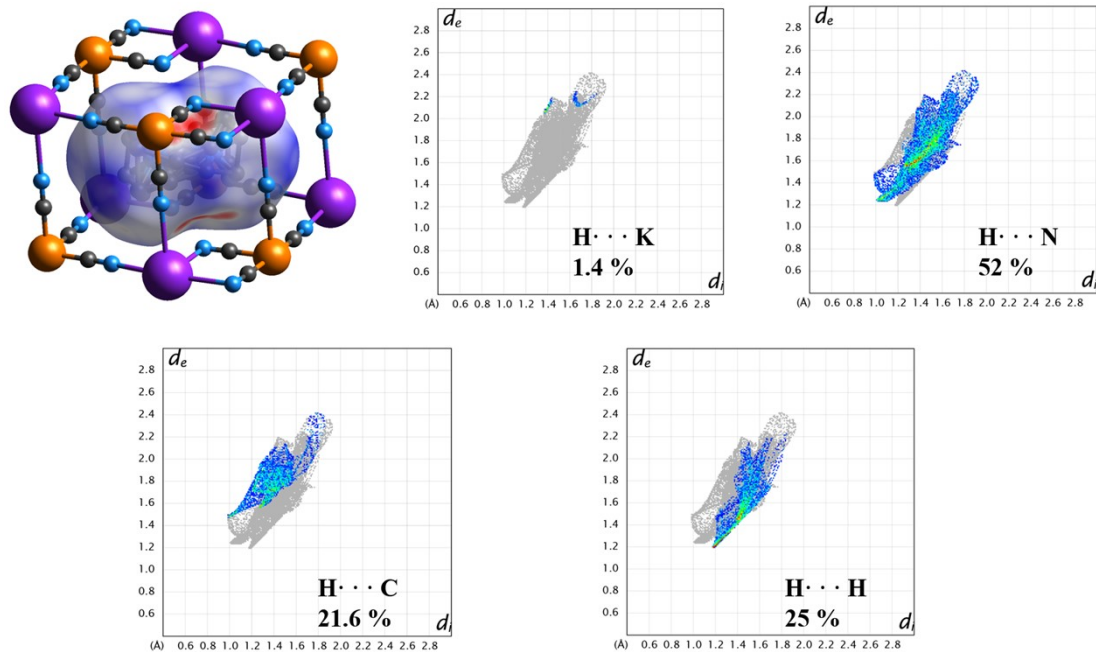

**Fig. S12** 3D  $d_{\text{norm}}$  Hirshfeld surface and 2D fingerprint plots of **3** at 323 K; the full fingerprint appears beneath each decomposed plot as a grey shadow.

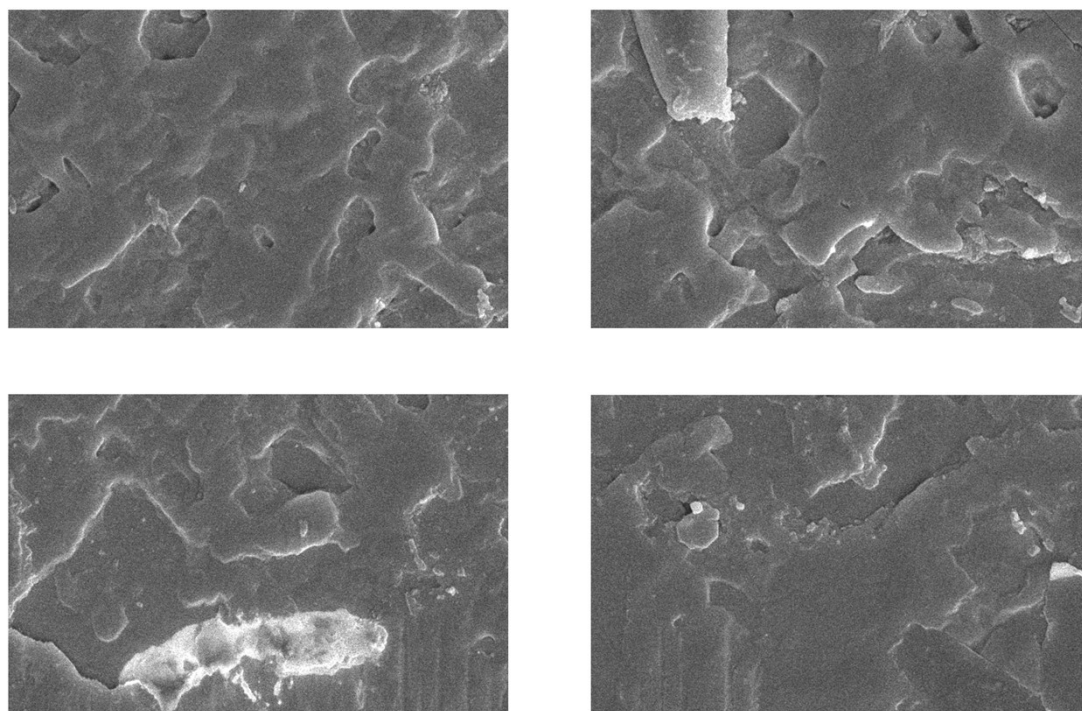

**Fig. S13** SEM image of smooth area of **1** at room temperature.



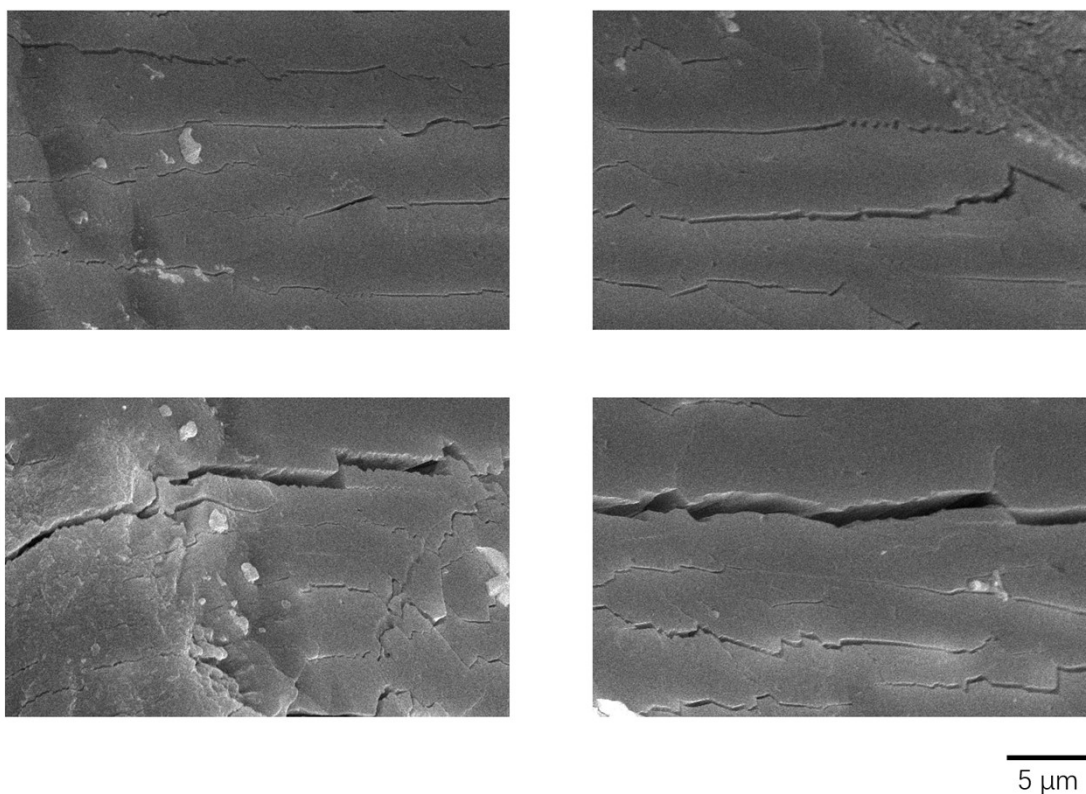

**Fig. S14** SEM image of coarse area of **1** at room temperature.

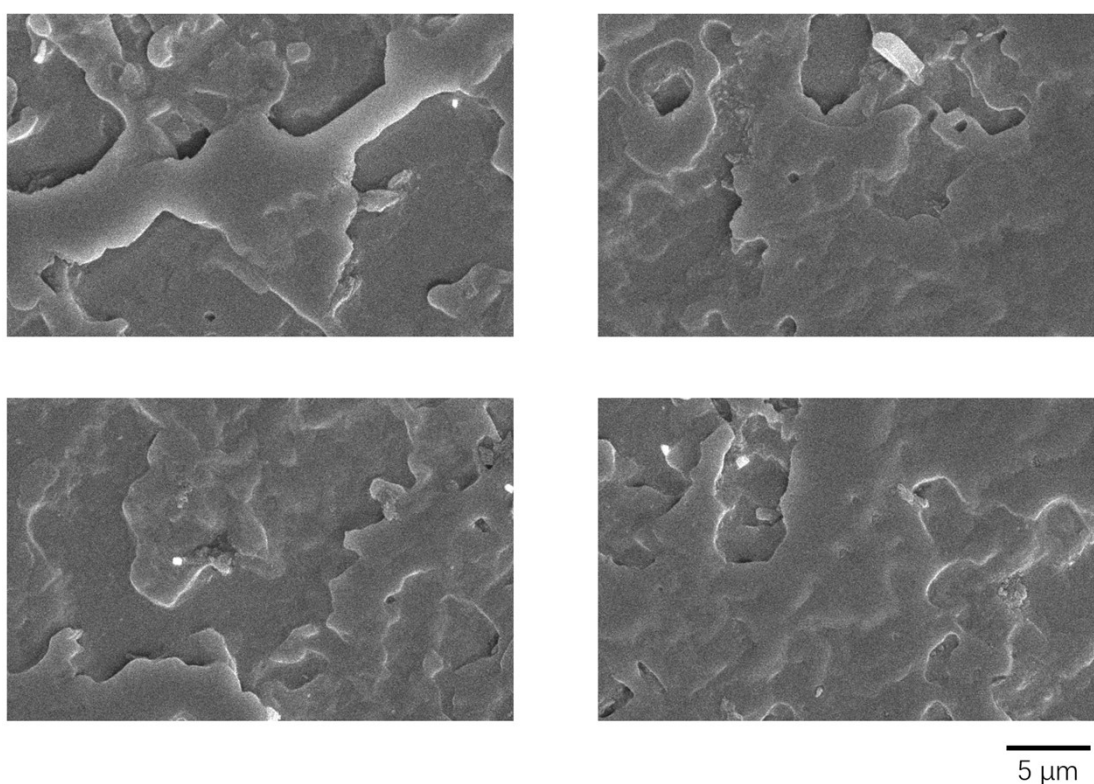

**Fig. S15** SEM image of smooth area of **2** at room temperature.

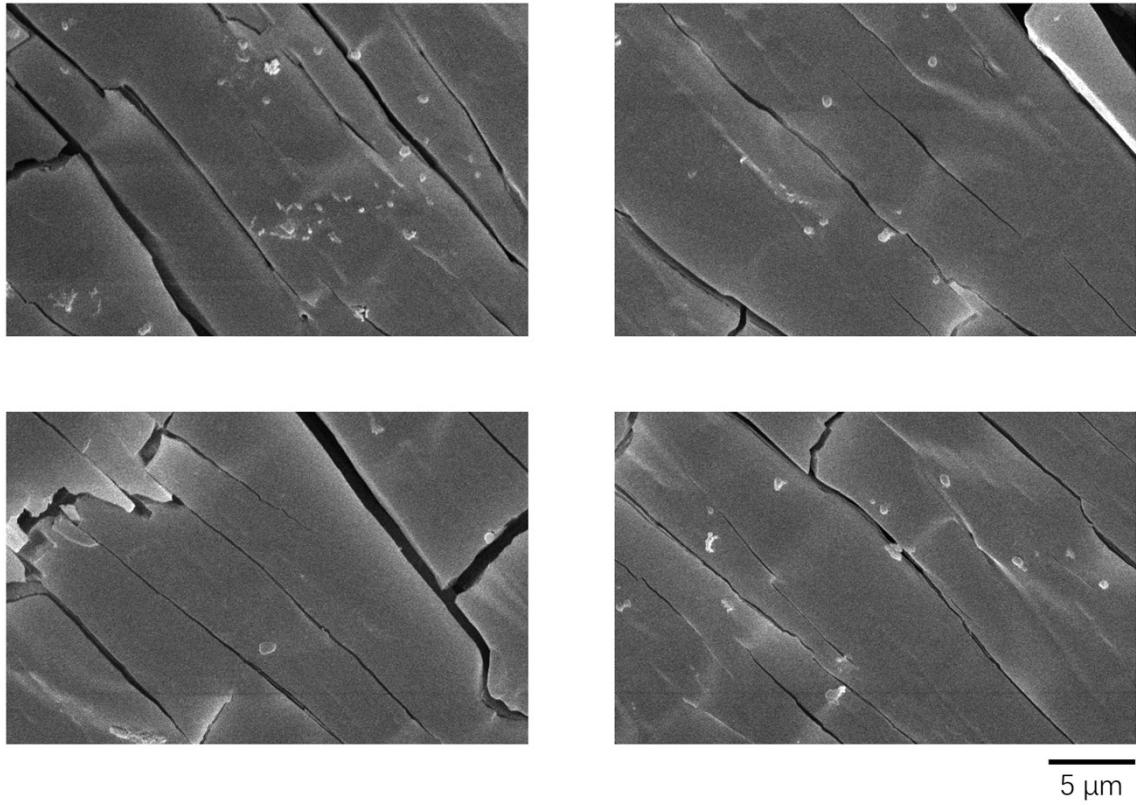

**Fig. S16** SEM image of coarse area of **2** at room temperature.

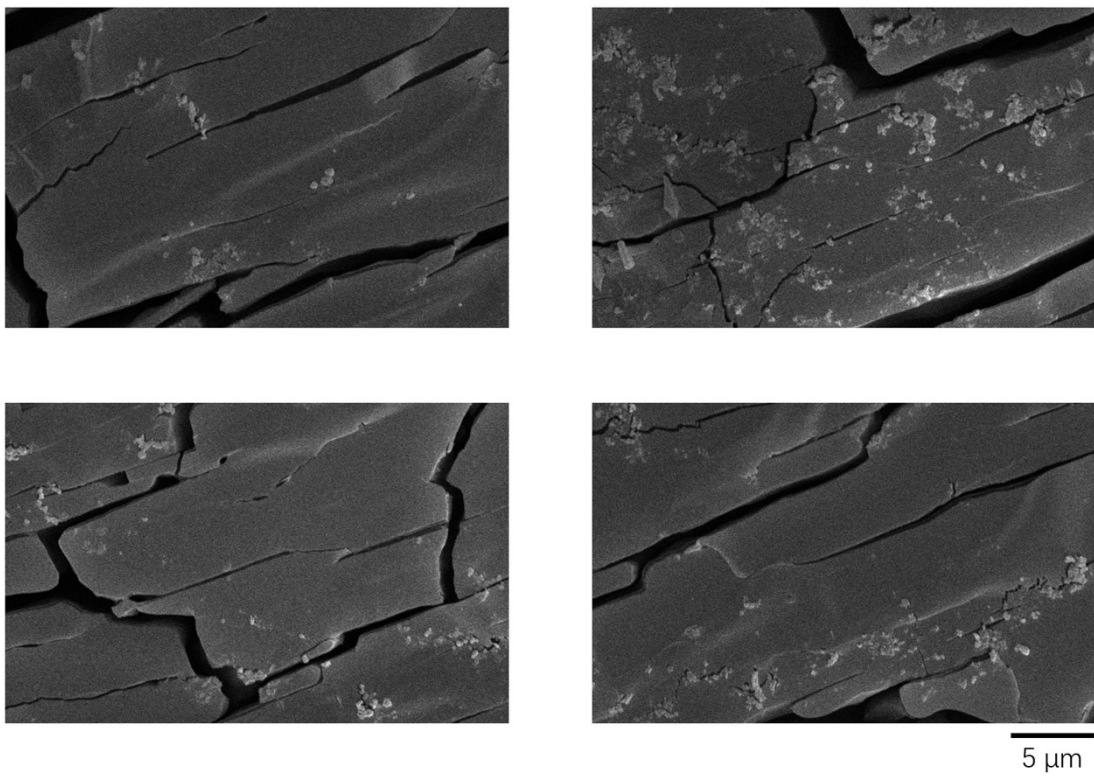

**Fig. S17** SEM image of smooth area of **3** at room temperature.

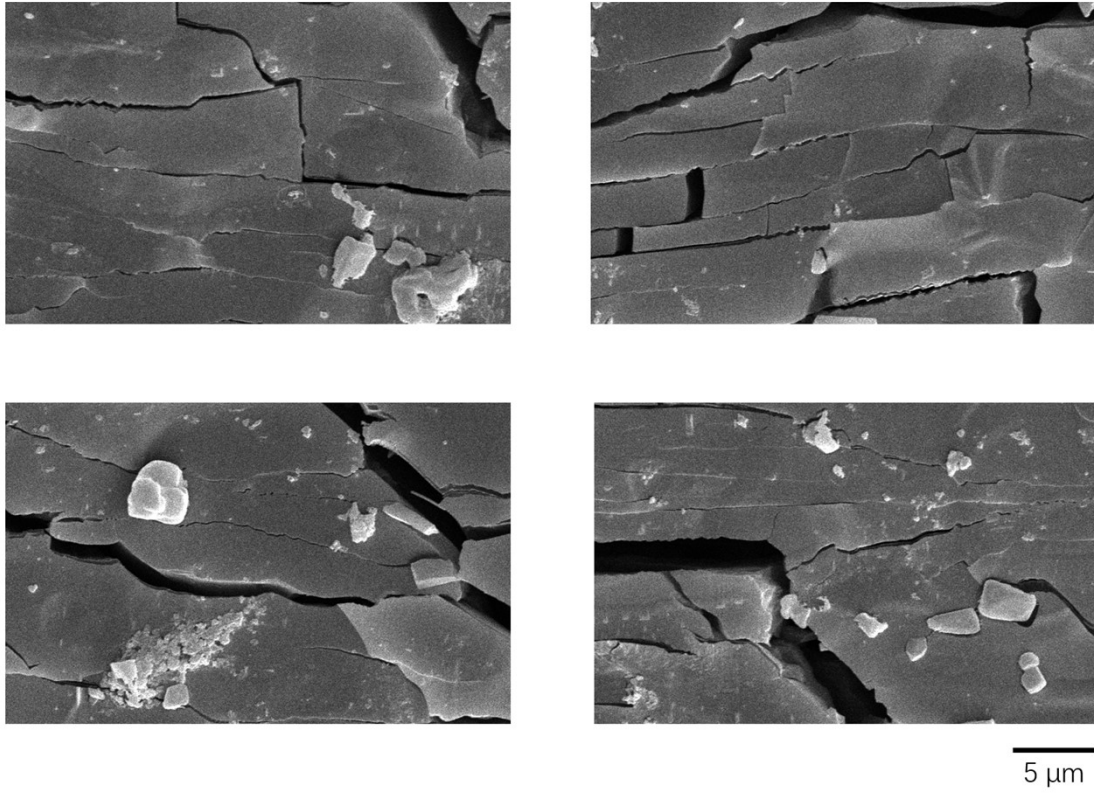

Fig. S18 SEM image of coarse area of 3 at room temperature.

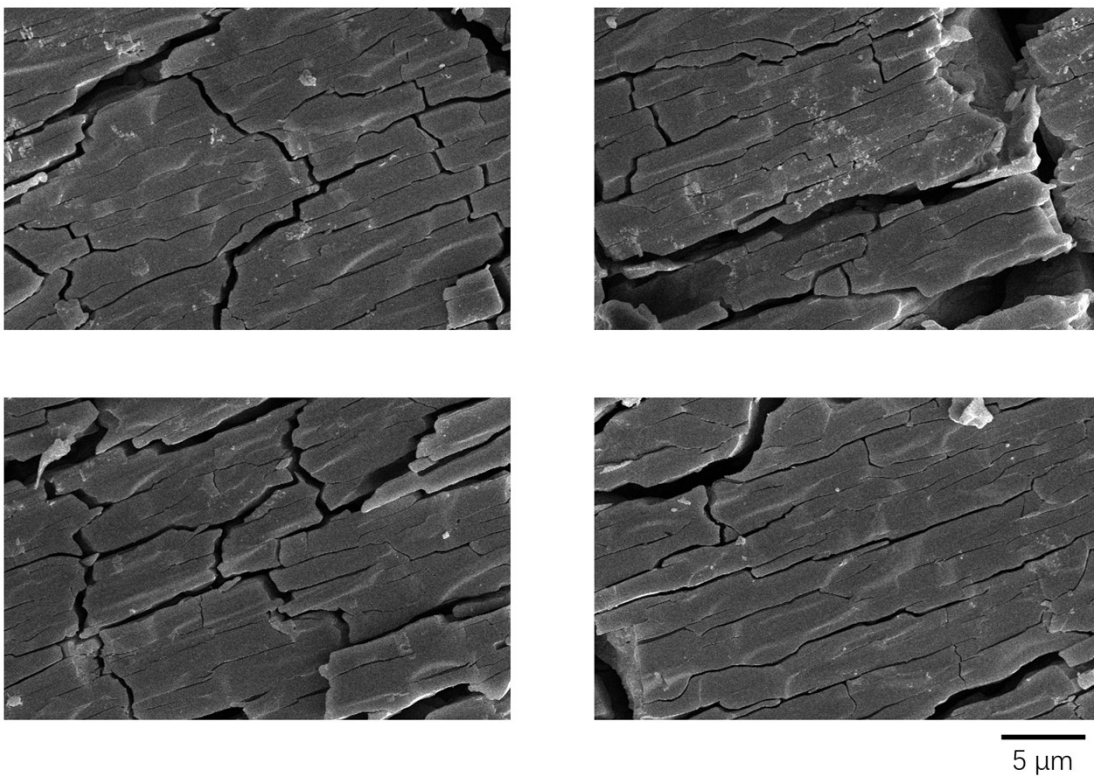

Fig. S19 SEM image of smooth area of 4 at room temperature.

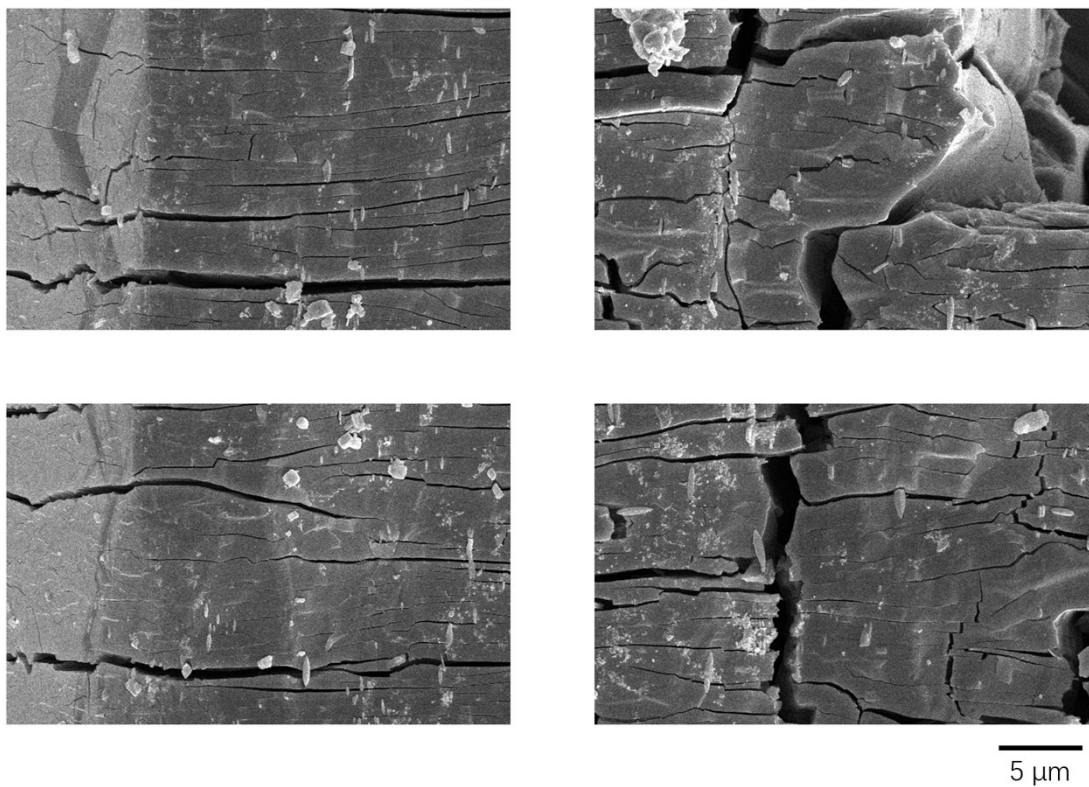

**Fig. S20** SEM image of coarse area of **1** at room temperature.

**Tab. S1** Crystal structure of **1, 2, 3** at different temperature.

|                                           | <b>1</b>                                                                | <b>2</b>                                                                | <b>2</b>                                                                | <b>3</b>                                                                       | <b>3</b>                                                                |
|-------------------------------------------|-------------------------------------------------------------------------|-------------------------------------------------------------------------|-------------------------------------------------------------------------|--------------------------------------------------------------------------------|-------------------------------------------------------------------------|
| CCDC number                               | 2248824                                                                 | 2248825                                                                 | 2268348                                                                 | 2268343                                                                        | 2268345                                                                 |
| Empirical formula                         | C <sub>13</sub> H <sub>20</sub> FeKN <sub>8</sub> O                     | C <sub>13</sub> H <sub>20</sub> CoKN <sub>8</sub> O                     | C <sub>13</sub> H <sub>20</sub> CoKN <sub>8</sub> O                     | C <sub>13</sub> H <sub>18</sub> FeKN <sub>8</sub>                              | C <sub>13</sub> H <sub>18</sub> FeKN <sub>8</sub>                       |
| Formula weight                            | 399.32                                                                  | 402.40                                                                  | 402.40                                                                  | 381.30                                                                         | 381.30                                                                  |
| Temperature [K]                           | 150.00                                                                  | 150.0                                                                   | 323.0                                                                   | 323.00                                                                         | 100.00                                                                  |
| Crystal system                            | orthorhombic                                                            | orthorhombic                                                            | orthorhombic                                                            | orthorhombic                                                                   | orthorhombic                                                            |
| Space group (number)                      | <i>P</i> 2 <sub>1</sub> 2 <sub>1</sub> 2 <sub>1</sub> (19)              | <i>P</i> 2 <sub>1</sub> 2 <sub>1</sub> 2 <sub>1</sub> (19)              | <i>Pnma</i> (62)                                                        | <i>Cmcm</i> (63)                                                               | <i>Pnma</i> (62)                                                        |
| <i>a</i> [Å]                              | 8.4554(3)                                                               | 8.4267(11)                                                              | 13.734(4)                                                               | 8.9462(11)                                                                     | 16.2028(8)                                                              |
| <i>b</i> [Å]                              | 13.6020(5)                                                              | 13.5866(16)                                                             | 8.566(2)                                                                | 16.1267(19)                                                                    | 12.4169(8)                                                              |
| <i>c</i> [Å]                              | 16.3290(6)                                                              | 16.2650(18)                                                             | 16.278(4)                                                               | 12.3909(15)                                                                    | 8.7273(5)                                                               |
| $\alpha$ [°]                              | 90                                                                      | 90                                                                      | 90                                                                      | 90                                                                             | 90                                                                      |
| $\beta$ [°]                               | 90                                                                      | 90                                                                      | 90                                                                      | 90                                                                             | 90                                                                      |
| $\gamma$ [°]                              | 90                                                                      | 90                                                                      | 90                                                                      | 90                                                                             | 90                                                                      |
| Volume [Å <sup>3</sup> ]                  | 1878.00(12)                                                             | 1862.2(4)                                                               | 1915.1(8)                                                               | 1787.7(4)                                                                      | 1755.83(17)                                                             |
| <i>Z</i>                                  | 4                                                                       | 4                                                                       | 4                                                                       | 4                                                                              | 4                                                                       |
| $\rho_{\text{calc}}$ [gcm <sup>-3</sup> ] | 1.412                                                                   | 1.435                                                                   | 1.396                                                                   | 1.417                                                                          | 1.442                                                                   |
| $\mu$ [mm <sup>-1</sup> ]                 | 1.042                                                                   | 1.162                                                                   | 1.130                                                                   | 1.087                                                                          | 1.107                                                                   |
| <i>F</i> (000)                            | 828                                                                     | 832                                                                     | 832                                                                     | 788                                                                            | 788                                                                     |
| Crystal size [mm]                         | 0.11×0.09×0.06                                                          | 0.06×0.05×0.04                                                          | 0.06×0.05×0.04                                                          | 0.13×0.12×0.1                                                                  | 0.1×0.07×0.06                                                           |
| Crystal colour                            | clear yellow                                                            | clear light colourless                                                  | clear light colourless                                                  | clear light yellow                                                             | clear light yellow                                                      |
| Crystal shape                             | block                                                                   | cube                                                                    | cube                                                                    | block                                                                          | block                                                                   |
| Radiation                                 | MoK $\alpha$<br>( $\lambda=0.71073$ Å)                                         | MoK $\alpha$<br>( $\lambda=0.71073$ Å)                                  |
| 2 $\theta$ range [°]                      | 3.90 to 52.75<br>(0.80 Å)                                               | 3.91 to 52.74<br>(0.80 Å)                                               | 3.88 to 52.86<br>(0.80 Å)                                               | 5.05 to 52.73<br>(0.80 Å)                                                      | 5.03 to 52.81<br>(0.80 Å)                                               |
| Index ranges                              | -9 ≤ <i>h</i> ≤ 10<br>-17 ≤ <i>k</i> ≤ 17<br>-17 ≤ <i>l</i> ≤ 20        | -10 ≤ <i>h</i> ≤ 10<br>-16 ≤ <i>k</i> ≤ 16<br>-20 ≤ <i>l</i> ≤ 19       | -13 ≤ <i>h</i> ≤ 17<br>-10 ≤ <i>k</i> ≤ 10<br>-20 ≤ <i>l</i> ≤ 19       | -11 ≤ <i>h</i> ≤ 10<br>-17 ≤ <i>k</i> ≤ 20<br>-15 ≤ <i>l</i> ≤ 14              | -20 ≤ <i>h</i> ≤ 18<br>-10 ≤ <i>k</i> ≤ 15<br>-7 ≤ <i>l</i> ≤ 10        |
| Reflections collected                     | 14567                                                                   | 17141                                                                   | 8316                                                                    | 3620                                                                           | 8186                                                                    |
| Independent reflections                   | 3817<br><i>R</i> <sub>int</sub> = 0.0602<br><i>R</i> <sub>sigma</sub> = | 3772<br><i>R</i> <sub>int</sub> = 0.0406<br><i>R</i> <sub>sigma</sub> = | 1928<br><i>R</i> <sub>int</sub> = 0.0886<br><i>R</i> <sub>sigma</sub> = | 1019<br><i>R</i> <sub>int</sub> = 0.0325<br><i>R</i> <sub>sigma</sub> = 0.0331 | 1880<br><i>R</i> <sub>int</sub> = 0.0746<br><i>R</i> <sub>sigma</sub> = |

|                                           |                                   |                                   |                                   |                                   |                                   |
|-------------------------------------------|-----------------------------------|-----------------------------------|-----------------------------------|-----------------------------------|-----------------------------------|
|                                           | 0.0559                            | 0.0327                            | 0.0784                            |                                   | 0.0541                            |
| Completeness to $\theta = 25.242^\circ$   | 99.5 %                            | 99.0 %                            | 91.0 %                            | 99.3 %                            | 99.9 %                            |
| Data / Restraints / Parameters            | 3817/0/223                        | 3772/0/223                        | 1928/195/160                      | 1019/220/128                      | 1880/0/164                        |
| Goodness-of-fit on $F^2$                  | 1.088                             | 0.986                             | 1.470                             | 1.090                             | 1.037                             |
| Final $R$ indexes [ $I \geq 2\sigma(I)$ ] | $R_1 = 0.0402$<br>$wR_2 = 0.0862$ | $R_1 = 0.0272$<br>$wR_2 = 0.0635$ | $R_1 = 0.1332$<br>$wR_2 = 0.3412$ | $R_1 = 0.0676$<br>$wR_2 = 0.2036$ | $R_1 = 0.0414$<br>$wR_2 = 0.0912$ |
| Final $R$ indexes [all data]              | $R_1 = 0.0532$<br>$wR_2 = 0.0953$ | $R_1 = 0.0315$<br>$wR_2 = 0.0663$ | $R_1 = 0.1657$<br>$wR_2 = 0.3739$ | $R_1 = 0.0929$<br>$wR_2 = 0.2341$ | $R_1 = 0.0667$<br>$wR_2 = 0.1053$ |
| Largest peak/hole [ $e\text{\AA}^{-3}$ ]  | 0.72/-0.35                        | 0.56/-0.26                        | 2.21/-0.88                        | 0.73/-0.67                        | 0.48/-0.60                        |

**Tab. S2** Selected atomic coordinates and  $U_{\text{eq}}$  [ $\text{\AA}^2$ ] for **1** at 150 K.

| Atom | $x$         | $y$         | $z$        | $U_{\text{eq}}$ |
|------|-------------|-------------|------------|-----------------|
| Fe1  | -0.01123(8) | 0.01586(4)  | 0.89474(4) | 0.01720(18)     |
| K2   | 0.02431(14) | -0.05068(7) | 0.63450(6) | 0.0221(3)       |
| N1   | -0.0057(6)  | 0.2799(3)   | 0.3168(2)  | 0.0266(9)       |
| N6   | -0.2074(6)  | -0.0263(4)  | 0.5157(3)  | 0.0323(11)      |
| N7   | 0.2794(6)   | -0.0786(4)  | 0.5307(3)  | 0.0340(12)      |
| N3   | -0.2446(6)  | -0.0388(4)  | 0.7552(3)  | 0.0268(11)      |
| C11  | 0.1624(6)   | -0.0025(4)  | 0.8188(3)  | 0.0192(11)      |
| C8   | -0.1577(6)  | -0.0187(4)  | 0.8072(3)  | 0.0211(11)      |
| N4   | 0.2634(5)   | -0.0142(4)  | 0.7733(3)  | 0.0267(11)      |
| C9   | -0.1884(6)  | 0.0230(4)   | 0.9714(3)  | 0.0255(12)      |
| C10  | 0.1337(6)   | 0.0536(4)   | 0.9808(3)  | 0.0231(12)      |
| N2   | -0.0351(5)  | 0.2623(3)   | 0.1706(2)  | 0.0187(9)       |
| C13  | -0.0272(6)  | 0.1541(3)   | 0.8643(3)  | 0.0218(10)      |
| C12  | 0.0195(8)   | -0.1208(3)  | 0.9220(3)  | 0.0295(12)      |
| C5   | -0.1267(7)  | 0.2810(4)   | 0.2474(3)  | 0.0256(13)      |
| H5A  | -0.207203   | 0.229064    | 0.255751   | 0.031           |

**Tab. S3** Selected atomic coordinates and  $U_{\text{eq}}$  [ $\text{\AA}^2$ ] for **2** at 150 K.

| Atom | x          | y           | z           | $U_{\text{eq}}$ |
|------|------------|-------------|-------------|-----------------|
| Co01 | 0.51175(5) | 0.48397(3)  | 0.60587(2)  | 0.02152(12)     |
| K02  | 0.47569(9) | 0.55157(5)  | 0.86655(4)  | 0.02633(17)     |
| N003 | 0.9645(3)  | 0.76098(19) | 0.82923(17) | 0.0241(6)       |
| N6   | 0.7419(4)  | 0.5378(2)   | 0.74384(19) | 0.0309(7)       |
| N4   | 0.9923(4)  | 0.77912(19) | 0.68209(16) | 0.0316(6)       |
| N10  | 0.7905(4)  | 0.4734(3)   | 0.48623(19) | 0.0338(7)       |
| N5   | 0.5304(3)  | 0.2667(2)   | 0.65523(19) | 0.0335(7)       |
| O008 | 0.4416(4)  | 0.3564(2)   | 0.8377(2)   | 0.0531(8)       |
| H00S | 0.493905   | 0.322799    | 0.874825    | 0.080           |
| H00T | 0.488145   | 0.341230    | 0.791333    | 0.080           |
| C009 | 0.3402(4)  | 0.5007(3)   | 0.6801(2)   | 0.0242(7)       |
| N8   | 0.2812(4)  | 0.4233(2)   | 0.4704(2)   | 0.0363(7)       |
| C00B | 0.5278(4)  | 0.3483(2)   | 0.63528(19) | 0.0253(7)       |
| C00C | 0.3689(4)  | 0.4477(3)   | 0.5209(2)   | 0.0267(7)       |
| C00D | 0.8713(4)  | 0.7801(3)   | 0.7524(2)   | 0.0294(8)       |
| H00A | 0.817398   | 0.844727    | 0.755508    | 0.035           |
| H00B | 0.790288   | 0.728284    | 0.744119    | 0.035           |
| N9   | 0.4612(5)  | 0.6999(2)   | 0.56467(19) | 0.0473(10)      |
| N7   | 0.2381(4)  | 0.5126(2)   | 0.72613(19) | 0.0307(7)       |
| C00G | 1.0187(5)  | 0.8549(2)   | 0.8698(2)   | 0.0333(8)       |
| H00C | 1.073851   | 0.896029    | 0.829374    | 0.050           |
| H00D | 1.091079   | 0.839166    | 0.915077    | 0.050           |
| H00E | 0.926437   | 0.890465    | 0.891231    | 0.050           |

**Tab. S4** Selected atomic coordinates and  $U_{\text{eq}}$  [ $\text{\AA}^2$ ] for **2** at 323 K.

| Atom | x           | y          | z           | $U_{\text{eq}}$ |
|------|-------------|------------|-------------|-----------------|
| Co01 | 0.76868(11) | 1.750000   | 0.60966(9)  | 0.0391(6)       |
| K1   | 0.6937(2)   | 1.750000   | 0.87242(16) | 0.0514(8)       |
| C003 | 0.9048(9)   | 1.750000   | 0.6351(9)   | 0.068(3)        |
| C10  | 0.6342(11)  | 1.750000   | 0.5835(11)  | 0.118(5)        |
| N1   | 0.9905(10)  | 1.266(2)   | 0.6860(8)   | 0.126(3)        |
| N8   | 0.7298(5)   | 1.9945(12) | 0.7413(5)   | 0.0604(17)      |
| N7   | 0.9854(7)   | 1.750000   | 0.6507(8)   | 0.068(3)        |
| C008 | 0.7434(6)   | 1.9039(14) | 0.6907(7)   | 0.0596(17)      |
| C009 | 0.7910(10)  | 1.5991(14) | 0.5298(7)   | 0.084(2)        |
| N2   | 0.9716(9)   | 1.276(2)   | 0.8200(9)   | 0.126(3)        |
| N6   | 0.8009(8)   | 1.4949(12) | 0.4802(6)   | 0.084(2)        |
| C4   | 0.9066(11)  | 1.246(5)   | 0.6432(11)  | 0.127(3)        |
| H4A  | 0.884962    | 1.345797   | 0.622838    | 0.190           |
| H4B  | 0.917738    | 1.177047   | 0.597861    | 0.190           |
| H4C  | 0.857648    | 1.203136   | 0.678582    | 0.190           |

|     |            |          |            |          |
|-----|------------|----------|------------|----------|
| C7  | 0.9757(16) | 1.124(2) | 0.7962(12) | 0.127(3) |
| H7A | 0.910876   | 1.079916 | 0.792420   | 0.152    |
| H7B | 1.013670   | 1.063076 | 0.834815   | 0.152    |
| N9  | 0.5547(9)  | 1.750000 | 0.5680(9)  | 0.119(5) |
| C2  | 0.8894(13) | 1.304(3) | 0.8624(13) | 0.127(3) |

**Tab. S5** Selected atomic coordinates and  $U_{\text{eq}}$  [ $\text{\AA}^2$ ] for **3** at 323 K.

| Atom | <i>x</i>    | <i>y</i>    | <i>z</i>   | $U_{\text{eq}}$ |
|------|-------------|-------------|------------|-----------------|
| Fe1  | 0.500000    | 0.63474(7)  | 0.750000   | 0.0398(5)       |
| K1   | 1.000000    | 0.86562(11) | 0.750000   | 0.0515(7)       |
| N1   | 0.7565(8)   | 0.7606(4)   | 0.750000   | 0.086(3)        |
| N2   | 0.500000    | 0.6357(5)   | 1.0005(5)  | 0.088(4)        |
| N3   | 0.2641(8)   | 0.4962(3)   | 0.750000   | 0.0579(17)      |
| C1   | 0.6582(9)   | 0.7158(4)   | 0.750000   | 0.0541(17)      |
| C2   | 0.500000    | 0.6352(4)   | 0.9085(6)  | 0.0534(17)      |
| C3   | 0.3506(8)   | 0.5491(4)   | 0.750000   | 0.0450(15)      |
| N4   | -0.008(2)   | 0.5677(9)   | 0.4949(12) | 0.069(4)        |
| N5   | -0.0208(18) | 0.4223(8)   | 0.4967(11) | 0.053(3)        |
| C4   | 0.003(4)    | 0.6114(11)  | 0.3968(13) | 0.088(5)        |
| H4A  | -0.095014   | 0.620042    | 0.367826   | 0.132           |
| H4B  | 0.062066    | 0.580302    | 0.346136   | 0.132           |
| H4C  | 0.050006    | 0.664032    | 0.409836   | 0.132           |
| C5   | -0.064(3)   | 0.6229(15)  | 0.5723(19) | 0.112(9)        |
| H5A  | -0.000220   | 0.670677    | 0.576873   | 0.169           |
| H5B  | -0.066430   | 0.595318    | 0.640923   | 0.169           |
| H5C  | -0.163070   | 0.639927    | 0.552783   | 0.169           |
| C6   | -0.1035(17) | 0.4978(10)  | 0.4839(18) | 0.063(4)        |

**Tab. S6** Selected atomic coordinates and  $U_{\text{eq}}$  [ $\text{\AA}^2$ ] for **3** at 100 K.

| Atom | <i>x</i>    | <i>y</i>  | <i>z</i>   | $U_{\text{eq}}$ |
|------|-------------|-----------|------------|-----------------|
| Fe01 | 0.63495(3)  | 0.750000  | 0.51932(6) | 0.01808(19)     |
| K002 | 0.87069(4)  | 0.750000  | 1.02002(9) | 0.0218(2)       |
| N003 | 0.75640(19) | 0.750000  | 0.7917(4)  | 0.0266(8)       |
| N004 | 0.49007(18) | 0.750000  | 0.7480(4)  | 0.0251(8)       |
| N005 | 0.50697(19) | 0.750000  | 0.2589(4)  | 0.0299(9)       |
| N006 | 0.63338(15) | 1.0009(2) | 0.5257(3)  | 0.0333(7)       |
| N00E | 0.7724(2)   | 0.750000  | 0.2750(4)  | 0.0504(12)      |
| C008 | 0.5554(2)   | 0.750000  | 0.3544(4)  | 0.0216(9)       |
| C009 | 0.5449(2)   | 0.750000  | 0.6638(4)  | 0.0187(8)       |
| C00A | 0.7123(2)   | 0.750000  | 0.6882(4)  | 0.0196(9)       |
| C00B | 0.63413(15) | 0.9081(3) | 0.5223(3)  | 0.0244(7)       |
| C00C | 0.7225(2)   | 0.750000  | 0.3684(4)  | 0.0284(10)      |



|      |            |            |            |          |
|------|------------|------------|------------|----------|
| N1   | 0.5637(9)  | 0.4980(17) | 0.010(2)   | 0.018(2) |
| N007 | 0.4138(8)  | 0.5010(18) | -0.031(2)  | 0.020(3) |
| C1   | 0.5165(11) | 0.5083(16) | 0.1618(13) | 0.027(3) |
| H1A  | 0.507961   | 0.436686   | 0.209226   | 0.032    |
| H1B  | 0.546858   | 0.554714   | 0.234820   | 0.032    |
| C2   | 0.6187(12) | 0.596(2)   | -0.013(2)  | 0.033(6) |
| H2A  | 0.643270   | 0.593612   | -0.115393  | 0.049    |
| H2B  | 0.662538   | 0.596202   | 0.064417   | 0.049    |

A similar step response of dielectric exhibited by cyano-bridged coordination polymers was shown in **Tab. S7**.

**Tab. S7** The Values of the  $T_c$ ,  $\Delta\varepsilon'$  and  $\varepsilon'$ (1 MHz) for selected cyano-bridged coordination polymers.

| Material                       | $T_c$ (K) | $\varepsilon'$ (LT) | $\varepsilon'$ (HT) | $\Delta\varepsilon'$ | Ref              |
|--------------------------------|-----------|---------------------|---------------------|----------------------|------------------|
| $[(CH_3)_4N]_2[KFe(CN)_6]$     | 245/253   | 13.5                | 16                  | 2.5                  | 4                |
| $(azetidinium)_2[KCr(CN)_6]$   | 171/174   | 3                   | 25                  | 22                   | 5                |
| $(azetidinium)_2[KFe(CN)_6]$   | 186/188   | 3                   | 35                  | 32                   | 5                |
| $[C(NH_2)_3]_2[KFe(CN)_6]$     | 406/411   | -                   | -                   |                      | 6                |
|                                | 435/439   | -                   | -                   |                      |                  |
| $[CH_3C(NH_2)_2]_2[KFe(CN)_6]$ | 199/201   | 4                   | 8                   | 4                    | 6                |
|                                | 381/385   | -                   | -                   | -                    |                  |
| $[(CH_3)NH_3]_2[KFe(CN)_6]$    | 429/423   | 5.3                 | 20                  | 15                   | 7                |
| $[(CH_3)_2NH_2]_2[KFe(CN)_6]$  | 226/224   | 5.1                 | 18                  | 12.9                 | 7                |
| $[(CH_3)_3NH_1]_2[KFe(CN)_6]$  | 316/312   | 5.5                 | 7.1                 | 1.6                  | 7                |
| $[(CH_3)_4N]_2[KFe(CN)_6]$     | 350/348   | 4.5                 | 4.5                 | -                    | 7                |
| $(HIm)_2[KFe(CN)_6]$           | 158       | 7.5                 | 23                  | 15.5                 | 8                |
| $(C_7N_2H_{18})[KFe(CN)_6]$    | 153       | 6.8                 | 8.1                 | 1.3                  | <b>This work</b> |
| $(C_7N_2H_{18})[KFe(CN)_6]$    | 159       | 6.3                 | 7.1                 | 0.8                  | <b>This work</b> |

## Reference

1. J. Zhang and T. Lu, Efficient evaluation of electrostatic potential with computerized optimized code, *Phys. Chem. Chem. Phys.*, 2021, **23**, 20323-20328.
2. T. Lu and F. Chen, Quantitative analysis of molecular surface based on improved Marching Tetrahedra algorithm, *J. Mol. Graphics Modell.*, 2012, **38**, 314-323.
3. D. Jayatilaka, S. K. Wolff, D. J. Grimwood, J. J. McKinnon and M. A. Spackman, CrystalExplorer: a tool for displaying Hirshfeld surfaces and visualising intermolecular interactions in molecular crystals, *Acta Crystallogr., Sect. A: Found. Adv.*, 2006, **62**, S90-S90.
4. X.-G. Chen, Z.-X. Zhang, Y.-L. Zeng, S.-Y. Tang and R.-G. Xiong, H/F Substitution induced switchable coordination bonds in a cyano-bridged hybrid double perovskite ferroelastic, *Chem. Commun.*, 2022, **58**, 3059-3062.
5. M. Rok, M. Moskwa, J. Hetmańczyk, Ł. Hetmańczyk and G. Bator, Switchable dielectric constant, structural and vibrational studies of double perovskite organic–inorganic hybrids: (azetidinium)<sub>2</sub>[KCr(CN)<sub>6</sub>] and (azetidinium)<sub>2</sub>[KFe(CN)<sub>6</sub>], *Crystengcomm*, 2022, **24**, 4932-4939.
6. W.-J. Xu, K.-P. Xie, Z.-F. Xiao, W.-X. Zhang and X.-M. Chen, Controlling Two-Step Phase Transitions and Dielectric Responses by A-Site Cations in Two Perovskite-like Coordination Polymers, *Cryst. Growth Des.*, 2016, **16**, 7212-7217.
7. W.-J. Xu, S.-L. Chen, Z.-T. Hu, R.-B. Lin, Y.-J. Su, W.-X. Zhang and X.-M. Chen, The cation-dependent structural phase transition and dielectric response in a family of cyano-bridged perovskite-like coordination polymers, *Dalton Trans.*, 2016, **45**, 4224-4229.
8. W. Zhang, Y. Cai, R.-G. Xiong, H. Yoshikawa and K. Awaga, Exceptional Dielectric Phase Transitions in a Perovskite-Type Cage Compound, *Angew. Chem., Int. Ed.*, 2010, **49**, 6608-6610.
